# Supplementary material for: Dual-mode multi-color circularly polarized luminescent MOFs from a facile approach of chiral induction
Source: Royal Society of Chemistry journal article supplement (doi:10.1039/d2tc03020a), 2022-01-01
Supplement: d2tc03020a2.pdf [file d2tc03020a2.pdf]

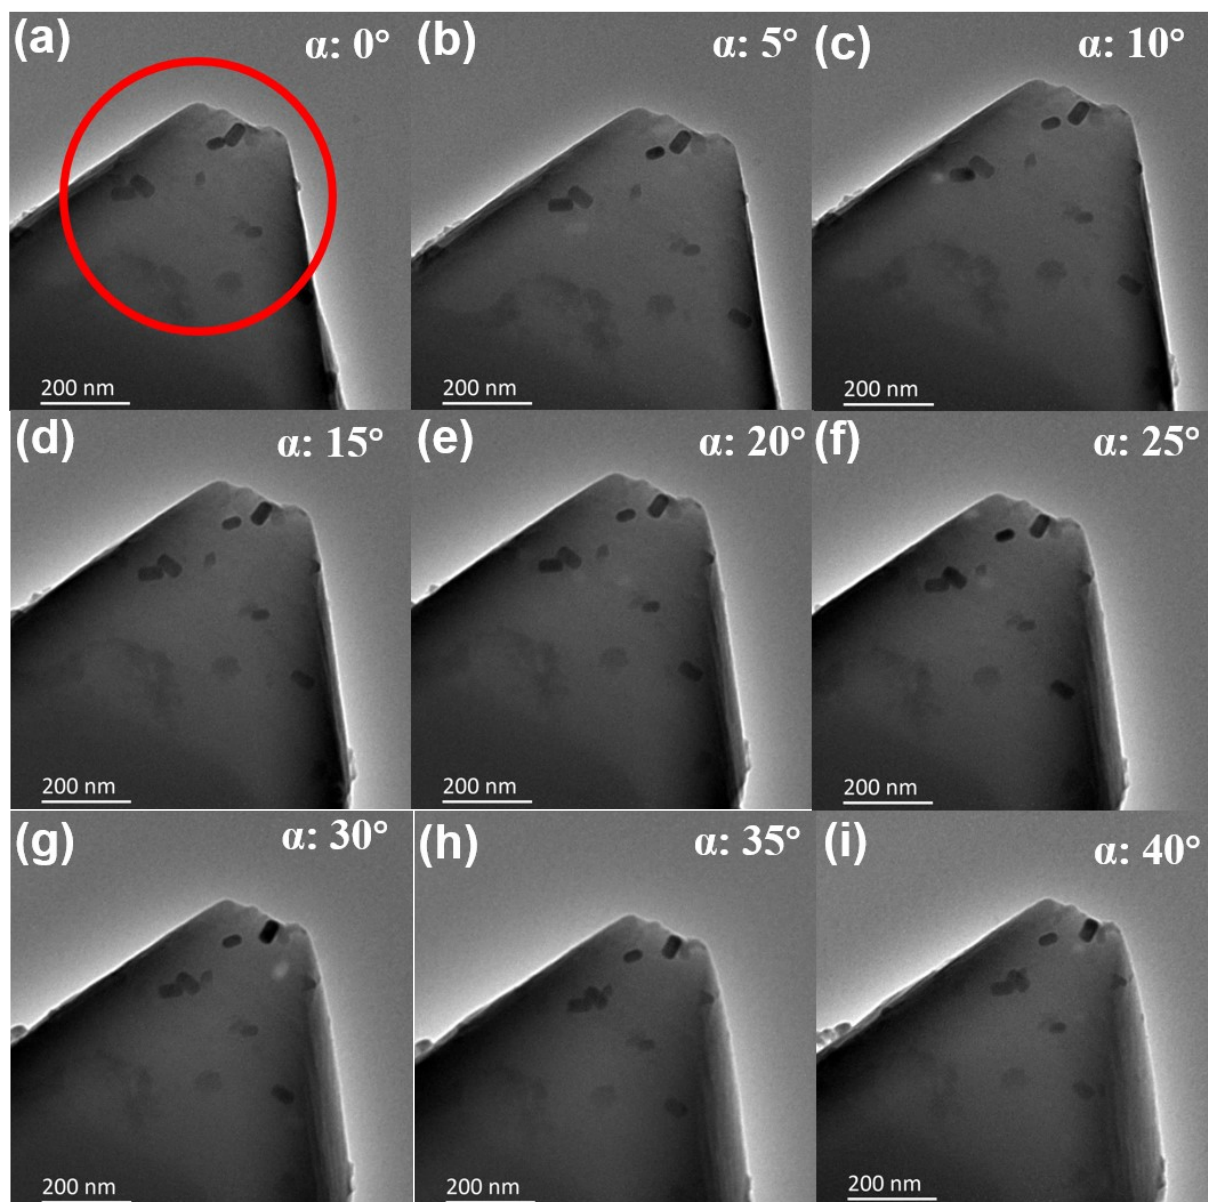

**Fig. S12** TEM image of L-Phe-Eu@UCNPs of copper mesh with (a)  $0^\circ$ , (b)  $5^\circ$ , (c)  $10^\circ$ , (d)  $15^\circ$ , (e)  $20^\circ$ , (f)  $25^\circ$ , (g)  $30^\circ$ , (h)  $35^\circ$ , (i)  $40^\circ$ .
