# Supplementary figures and images for: Dual-mode multi-color circularly polarized luminescent MOFs from a facile approach of chiral induction
Source: Royal Society of Chemistry journal article supplement (doi:10.1039/d2tc03020a), 2022-01-01

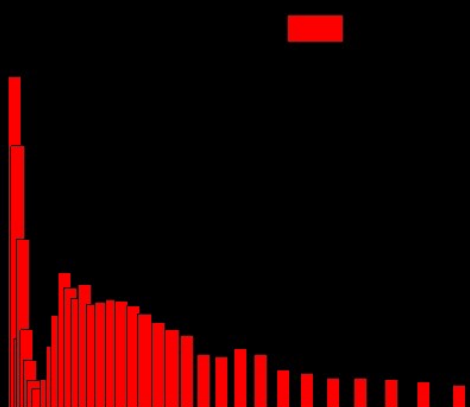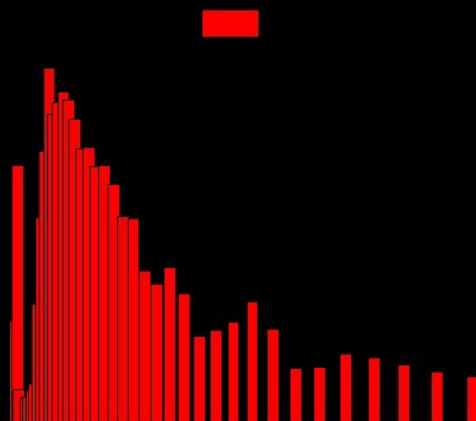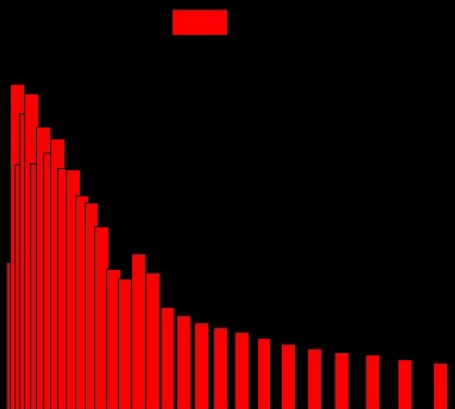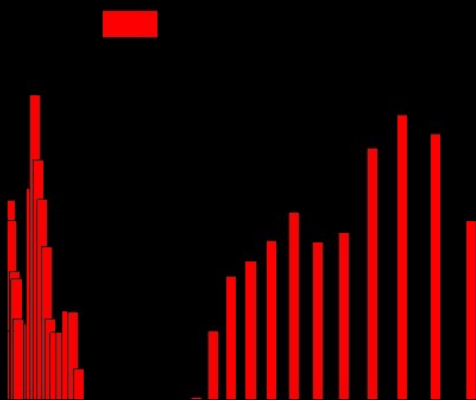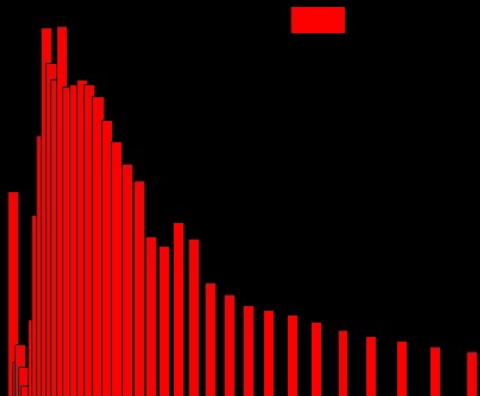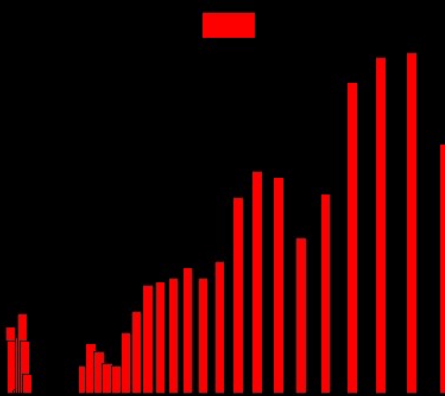

Supplement: d2tc03020a3.pdf [file d2tc03020a3.pdf]
